# Supplementary material
Source: ML conference proceedings conference paper supplement (https://openreview.net/forum?id=lWq3KDEIXIE)
Supplement: supplementary_material [file attachment]

---

# Learning Tractable Probabilistic Models from Inconsistent Local Estimates

---

Shasha Jin, Vasundhara Komaragiri, Tahrima Rahman, and Vibhav Gogate  
The University of Texas at Dallas

## Appendix

### A Proof of Proposition 2

The partial derivative of

$$\lambda_1 \sum_{(X_j, X_k) \in \mathcal{E}} \sum_{x_j, x_k} \mathcal{P}_{jk}(x_j, x_k) \log \mathcal{R}_\Theta(x_j, x_k)$$

w.r.t.  $\theta_{x_i, \mathbf{u}_i}$  is given by

$$\lambda_1 \sum_{(X_j, X_k) \in \mathcal{E}} \sum_{x_j, x_k} \mathcal{P}_{jk}(x_j, x_k) \left( \frac{\mathcal{R}_\Theta(\mathbf{u}_i, X_i = 1 | x_j, x_k)}{\theta_{x_i, \mathbf{u}_i}} - \frac{\mathcal{R}_\Theta(\mathbf{u}_i, X_i = 0 | x_j, x_k)}{1 - \theta_{x_i, \mathbf{u}_i}} \right) \quad (1)$$

*Proof.*

$$\frac{\partial \log \mathcal{R}_\theta(x_j, x_k)}{\partial \theta_{x_i, \mathbf{u}_i}} = \frac{1}{\mathcal{R}_\theta(x_j, x_k)} \frac{\partial \mathcal{R}_\theta(x_j, x_k)}{\partial \theta_{x_i, \mathbf{u}_i}} \quad (2)$$

Using the sum rule of probability theory,  $\mathcal{R}_\theta(x_j, x_k)$  equals

$$\begin{aligned} &= \sum_{x_i, \mathbf{u}_i} \mathcal{R}_\theta(x_j, x_k, \mathbf{u}_i, x_i) \\ &= \sum_{x_i, \mathbf{u}_i} \mathcal{R}_\theta(\mathbf{u}_i, x_i) \mathcal{R}_\theta(x_j, x_k, \mathbf{u}_i, x_i) \end{aligned} \quad (3)$$

$$= \sum_{x_i, \mathbf{u}_i} \mathcal{R}_\theta(x_i | \mathbf{u}_i) \mathcal{R}_\theta(\mathbf{u}_i) \mathcal{R}_\theta(x_j, x_k | \mathbf{u}_i, x_i) \quad (4)$$

Since  $\mathcal{R}_\theta(x_i | \mathbf{u}_i) = \theta_{x_i, \mathbf{u}_i}$  if  $X_i = 1$  and  $\mathcal{R}_\theta(x_i | \mathbf{u}_i) = 1 - \theta_{x_i, \mathbf{u}_i}$  if  $X_i = 0$ , we have:

$$\begin{aligned} \mathcal{R}_\theta(x_j, x_k) &= \sum_{\mathbf{u}_i} \theta_{x_i, \mathbf{u}_i} \mathcal{R}_\theta(\mathbf{u}_i) \mathcal{R}_\theta(x_j, x_k | \mathbf{u}_i, X_i = 1) \\ &\quad + \sum_{\mathbf{u}_i} (1 - \theta_{x_i, \mathbf{u}_i}) \mathcal{R}_\theta(\mathbf{u}_i) \mathcal{R}_\theta(x_j, x_k | \mathbf{u}_i, X_i = 0) \end{aligned} \quad (5)$$

Differentiating the Equation above (Eq. (5)) w.r.t.  $\theta_{x_i, \mathbf{u}_i}$ , we get:

$$\begin{aligned} \frac{\partial \mathcal{R}_\theta(x_j, x_k)}{\partial \theta_{x_i, \mathbf{u}_i}} &= \mathcal{R}_\theta(\mathbf{u}_i) \mathcal{R}_\theta(x_j, x_k | \mathbf{u}_i, X_i = 1) \\ &\quad - \mathcal{R}_\theta(\mathbf{u}_i) \mathcal{R}_\theta(x_j, x_k | \mathbf{u}_i, X_i = 0) \end{aligned} \quad (6)$$

Since

$$\mathcal{R}_\theta(\mathbf{u}_i) \mathcal{R}_\theta(x_j, x_k | \mathbf{u}_i, X_i = 1) = \frac{\mathcal{R}_\theta(x_j, x_k, \mathbf{u}_i, X_i = 1)}{\theta_{x_i, \mathbf{u}_i}} \quad (7)$$

and

$$\mathcal{R}_\theta(\mathbf{u}_i)\mathcal{R}_\theta(x_j, x_k|\mathbf{u}_i, X_i = 0) = \frac{\mathcal{R}_\theta(x_j, x_k, \mathbf{u}_i, X_i = 0)}{1 - \theta_{x_i, \mathbf{u}_i}} \quad (8)$$

we can rewrite Eq. (6) as:

$$\frac{\partial \mathcal{R}_\theta(x_j, x_k)}{\partial \theta_{x_i, \mathbf{u}_i}} = \frac{\mathcal{R}_\theta(x_j, x_k, \mathbf{u}_i, X_i = 1)}{\theta_{x_i, \mathbf{u}_i}} - \frac{\mathcal{R}_\theta(x_j, x_k, \mathbf{u}_i, X_i = 0)}{1 - \theta_{x_i, \mathbf{u}_i}} \quad (9)$$

Substituting Eq. (9) in Eq. (2) and using the definition of conditional probability, we get:

$$\frac{\partial \log \mathcal{R}_\theta(x_j, x_k)}{\partial \theta_{x_i, \mathbf{u}_i}} = \frac{\mathcal{R}_\Theta(\mathbf{u}_i, X_i = 1|x_j, x_k)}{\theta_{x_i, \mathbf{u}_i}} - \frac{\mathcal{R}_\Theta(\mathbf{u}_i, X_i = 0|x_j, x_k)}{1 - \theta_{x_i, \mathbf{u}_i}} \quad (10)$$

□

## B Additional Experimental Results

Table 1: Discriminative (20% evidence) performance of  $\mathcal{Q}$  and  $\mathcal{R}$  on three models: CLTs, CNs, MCNs.

| Datasets #var    |      | Negative cross-entropy with <b>20% Evidence</b> |                |               |                |               |                |
|------------------|------|-------------------------------------------------|----------------|---------------|----------------|---------------|----------------|
|                  |      | CLTs                                            |                | CNs           |                | MCNs          |                |
|                  |      | $\mathcal{Q}$                                   | $\mathcal{R}$  | $\mathcal{Q}$ | $\mathcal{R}$  | $\mathcal{Q}$ | $\mathcal{R}$  |
| nlcs             | 16   | -4.81                                           | <b>-4.42</b>   | -4.91         | <b>-4.66</b>   | -4.34         | <b>-4.10</b>   |
| msnbc            | 17   | -5.78                                           | <b>-5.61</b>   | -6.23         | <b>-6.10</b>   | -5.25         | <b>-4.89</b>   |
| kdd              | 64   | -5.10                                           | <b>-3.55</b>   | -5.34         | <b>-3.06</b>   | -4.81         | <b>-3.38</b>   |
| plants           | 69   | -13.63                                          | <b>-12.82</b>  | -13.32        | <b>-12.88</b>  | -12.59        | <b>-12.02</b>  |
| audio            | 100  | -42.35                                          | <b>-40.19</b>  | -40.58        | <b>-37.15</b>  | -37.86        | <b>-35.27</b>  |
| jester           | 100  | -55.06                                          | <b>-52.38</b>  | -51.99        | <b>-51.58</b>  | -49.06        | <b>-47.08</b>  |
| netflix          | 100  | -60.74                                          | <b>-60.16</b>  | -55.43        | <b>-53.05</b>  | -52.32        | <b>-50.85</b>  |
| accidents        | 111  | -37.18                                          | <b>-36.25</b>  | -36.72        | <b>-34.97</b>  | -33.30        | <b>-32.68</b>  |
| retail           | 135  | -15.12                                          | <b>-12.42</b>  | -15.05        | <b>-13.02</b>  | -14.14        | <b>-11.65</b>  |
| pumsb*           | 163  | -34.21                                          | <b>-32.23</b>  | -31.19        | <b>-28.78</b>  | -29.17        | <b>-28.14</b>  |
| dna              | 180  | -95.59                                          | <b>-91.40</b>  | -115.77       | <b>-94.19</b>  | -92.93        | <b>-82.54</b>  |
| kosarek          | 190  | -16.98                                          | <b>-12.71</b>  | -13.32        | <b>-12.01</b>  | -11.68        | <b>-9.04</b>   |
| msweb            | 294  | -13.47                                          | <b>-11.46</b>  | -14.04        | <b>-11.98</b>  | -12.14        | <b>-11.37</b>  |
| book             | 500  | -26.51                                          | <b>-23.10</b>  | -42.92        | <b>-21.25</b>  | -32.43        | <b>-20.19</b>  |
| movie            | 500  | -86.17                                          | <b>-66.97</b>  | -67.89        | <b>-59.64</b>  | -59.34        | <b>-41.97</b>  |
| webkb            | 839  | -182.77                                         | <b>-155.29</b> | -173.35       | <b>-144.99</b> | -162.70       | <b>-131.96</b> |
| reuters          | 889  | -124.07                                         | <b>-99.43</b>  | -132.16       | <b>-105.33</b> | -128.97       | <b>-102.87</b> |
| 20newsg          | 910  | -182.35                                         | <b>-151.92</b> | -167.36       | <b>-152.8</b>  | -163.80       | <b>-142.50</b> |
| bbc              | 1056 | -308.09                                         | <b>-247.37</b> | -250.69       | <b>-193.32</b> | -240.87       | <b>-195.05</b> |
| ad               | 1558 | -98.00                                          | <b>-37.23</b>  | -74.93        | <b>-36.43</b>  | -77.56        | <b>-36.68</b>  |
| <b>Total AVG</b> |      | -70.34                                          | <b>-57.85</b>  | -65.66        | <b>-53.86</b>  | -61.26        | <b>-50.21</b>  |

Table 1 has the 20% evidence results to supplement the discriminative performance results presented in the main paper (with 50% and 80% evidences).

Next, we present the plots for all the 20 datasets. We varied the perturb rate  $h$  and standard deviation  $\sigma$  as described in the main paper. Figures 1 – 5 and Figures 6 – 10 show the respective results.

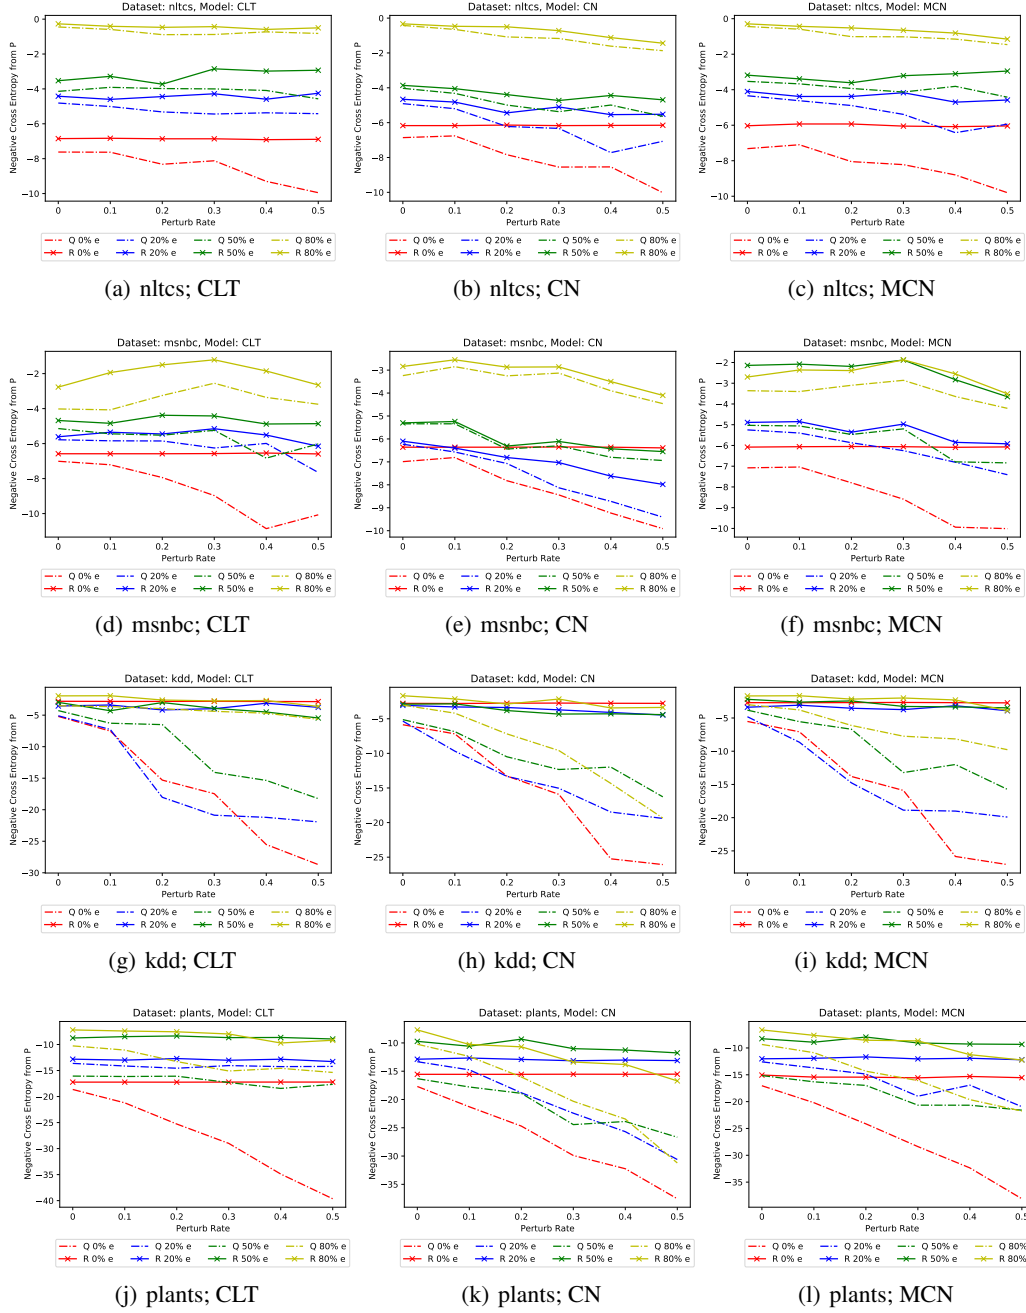

Figure 1: Negative Cross Entropy of  $\mathcal{P}$  and  $\mathcal{Q}$ ,  $\mathcal{P}$  and  $\mathcal{R}$  with evidence of 0%, 20%, 50%, and 80% on three different models: CLT, CN, and MCN, as a function of perturb rate for datasets: nltcs, msnbc, kdd, plants.

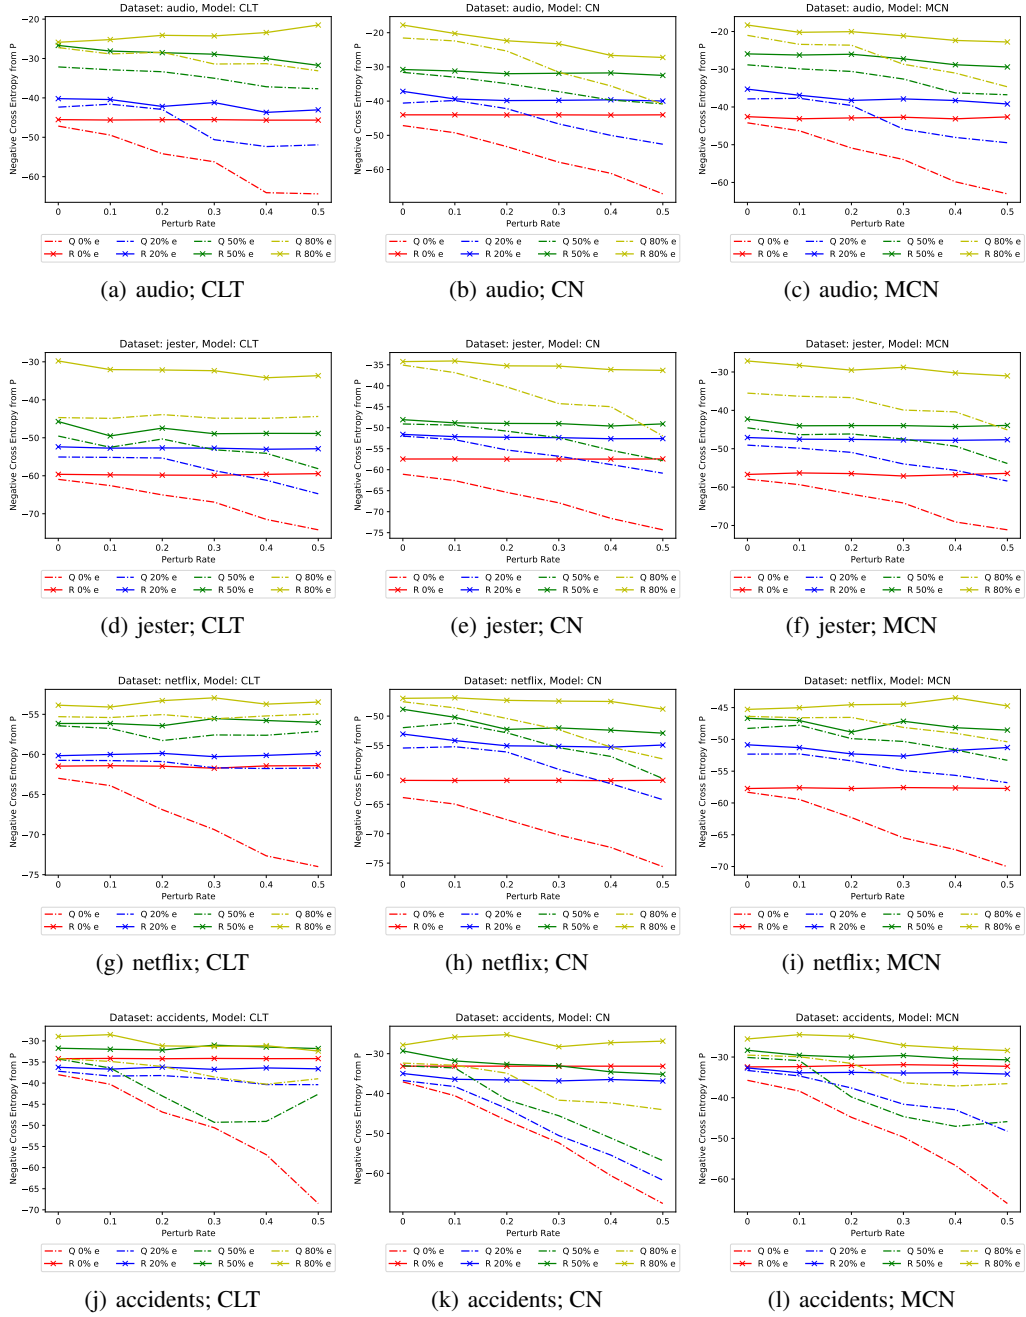

Figure 2: Negative Cross Entropy of  $\mathcal{P}$  and  $\mathcal{Q}$ ,  $\mathcal{P}$  and  $\mathcal{R}$  with evidence of 0%, 20%, 50%, and 80% on three different models: CLT, CN, and MCN, as a function of perturb rate for datasets: audio, jester, netflix, accidents.

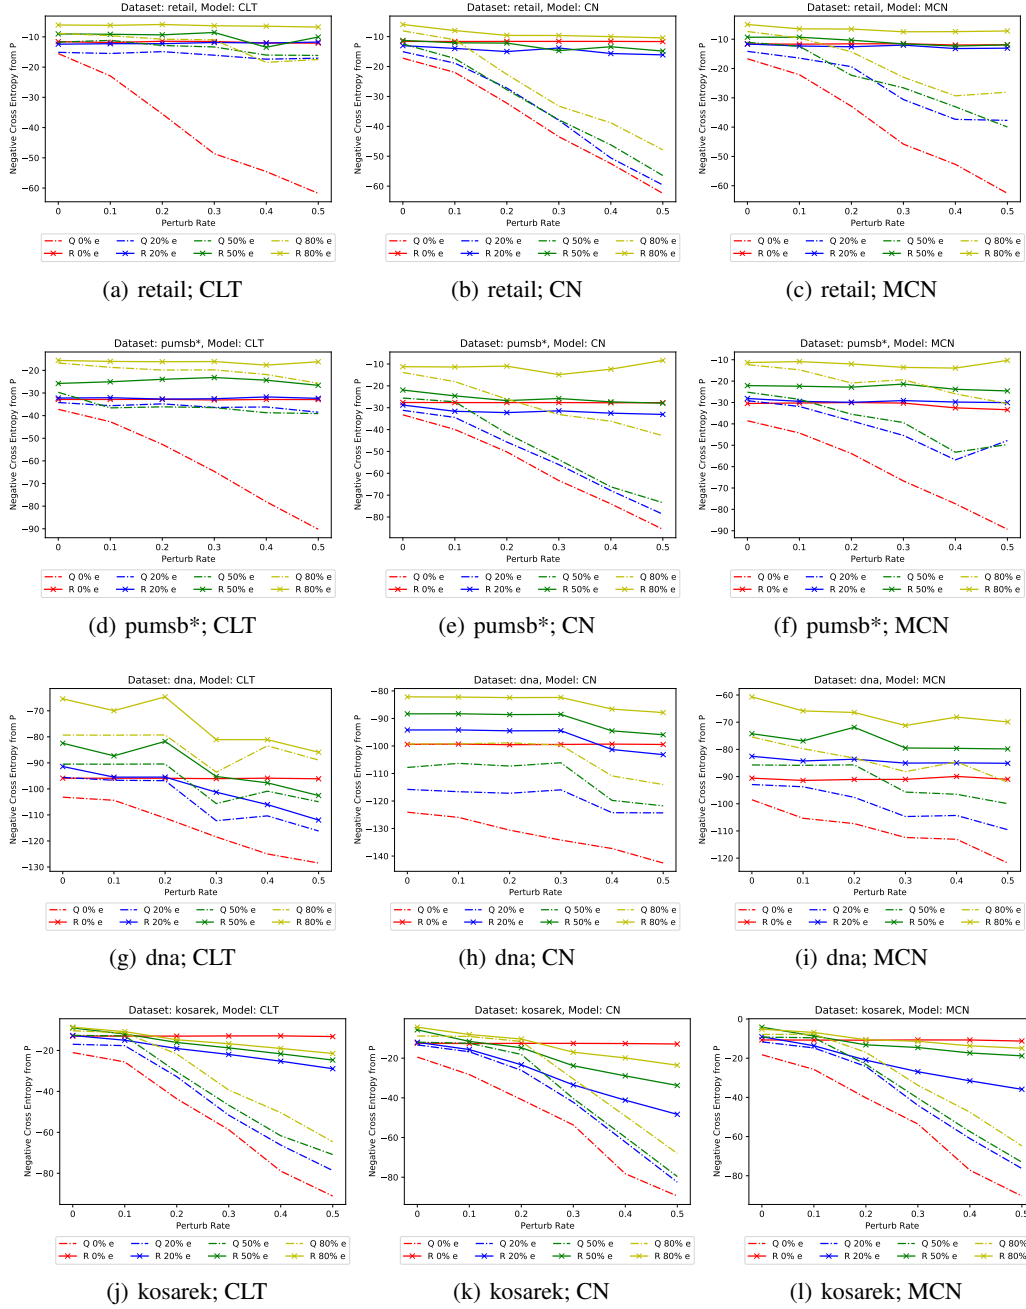

Figure 3: Negative Cross Entropy of  $\mathcal{P}$  and  $\mathcal{Q}$ ,  $\mathcal{P}$  and  $\mathcal{R}$  with evidence of 0%, 20%, 50%, and 80% on three different models: CLT, CN, and MCN, as a function of perturb rate for datasets: retail, pumsb\*, dna, kosarek,

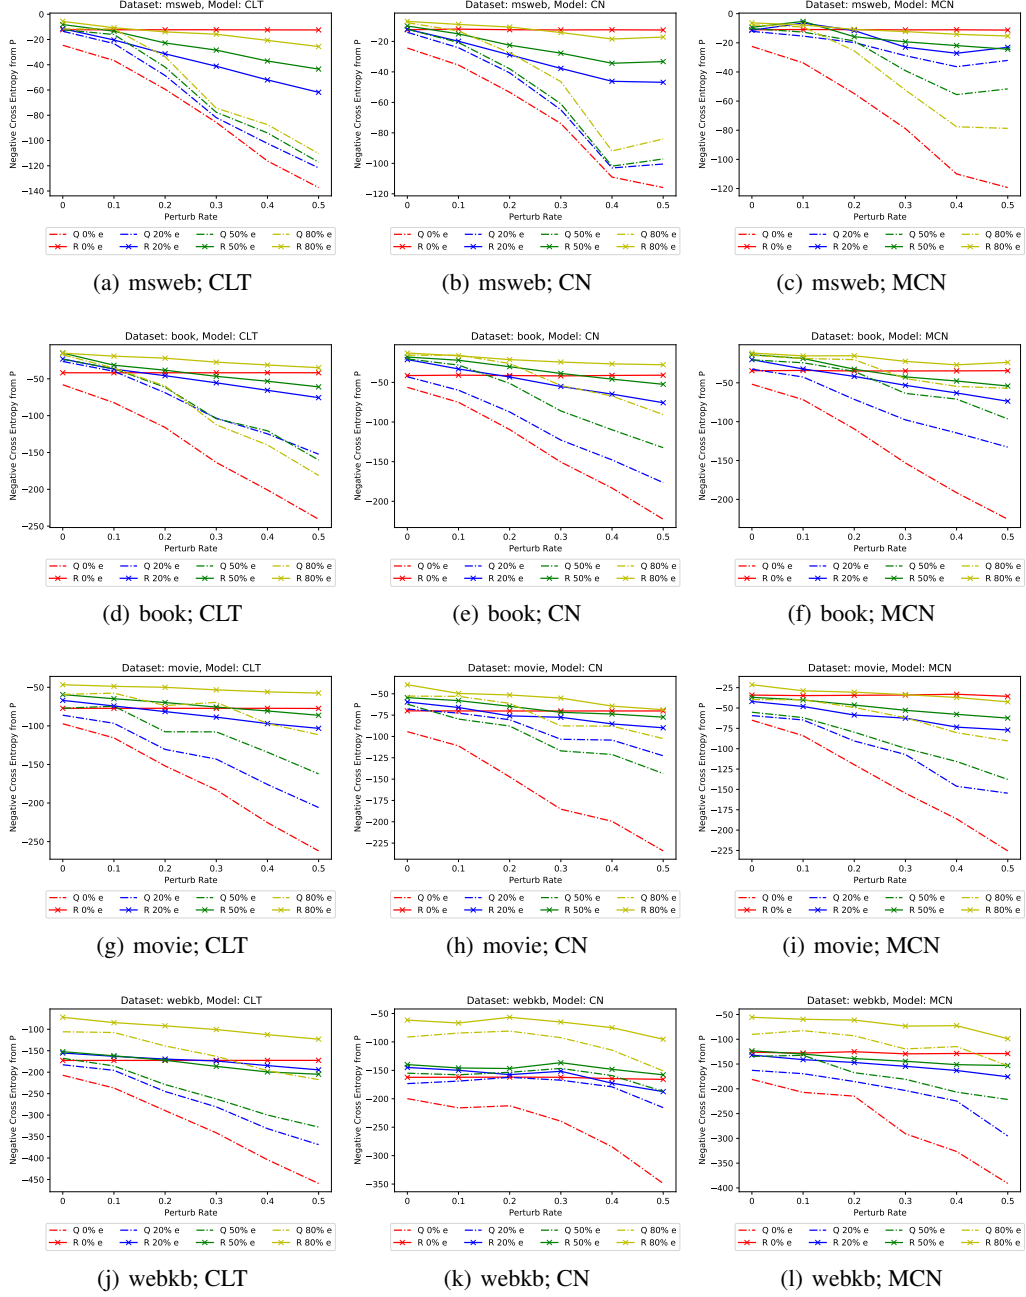

Figure 4: Negative Cross Entropy of  $\mathcal{P}$  and  $\mathcal{Q}$ ,  $\mathcal{P}$  and  $\mathcal{R}$  with evidence of 0%, 20%, 50%, and 80% on three different models: CLT, CN, and MCN, as a function of perturb rate for: msweb, book, movie, webkb.

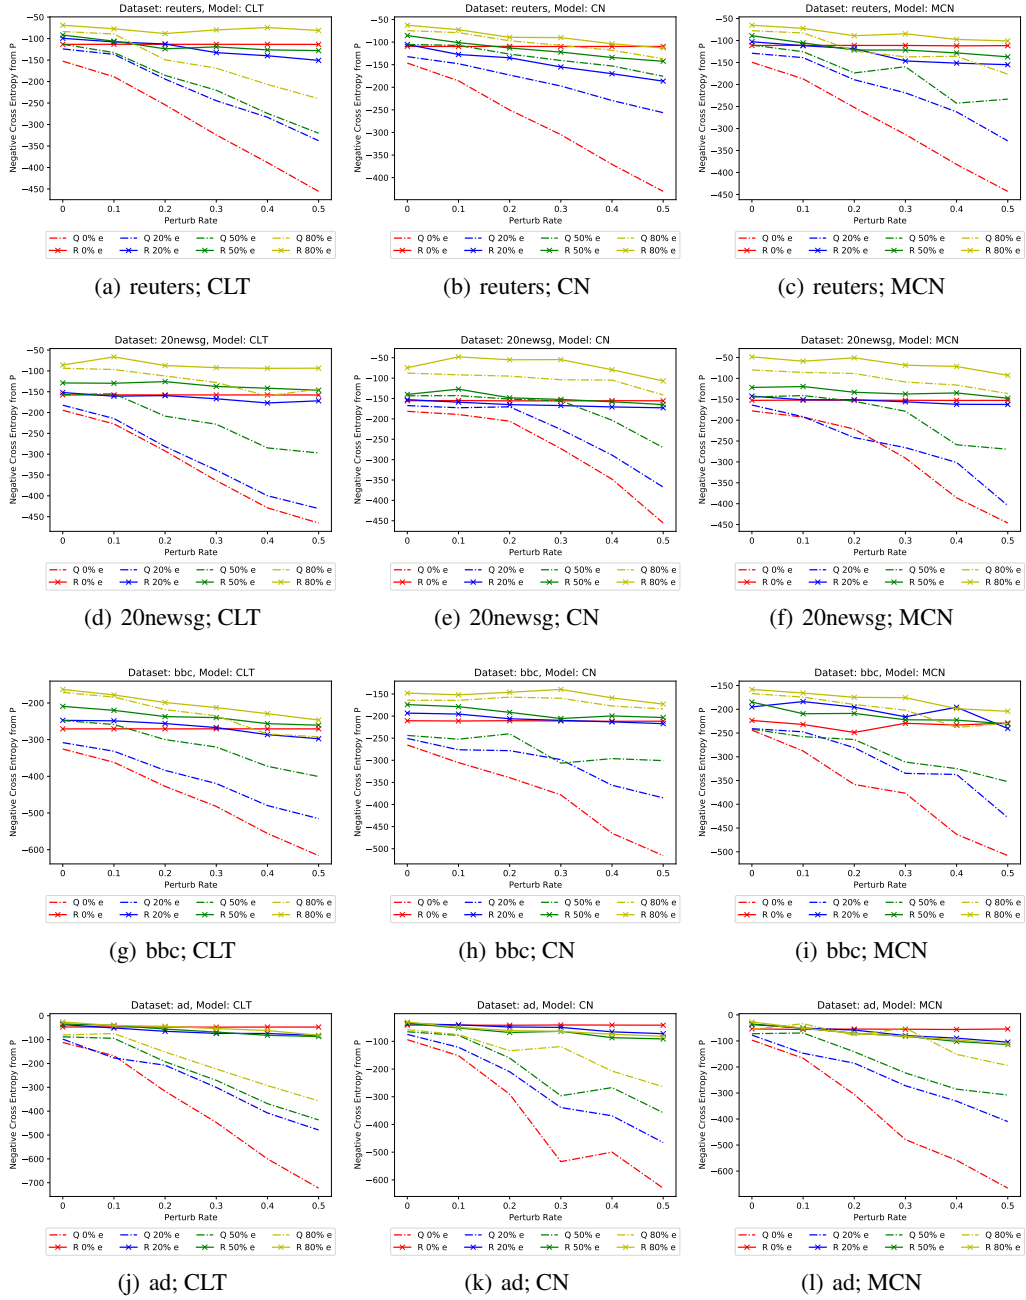

Figure 5: Negative Cross Entropy of  $\mathcal{P}$  and  $\mathcal{Q}$ ,  $\mathcal{P}$  and  $\mathcal{R}$  with evidence of 0%, 20%, 50%, and 80% on three different models: CLT, CN, and MCN, as a function of perturb rate for datasets: reuters, 20newsg, bbc, ad.

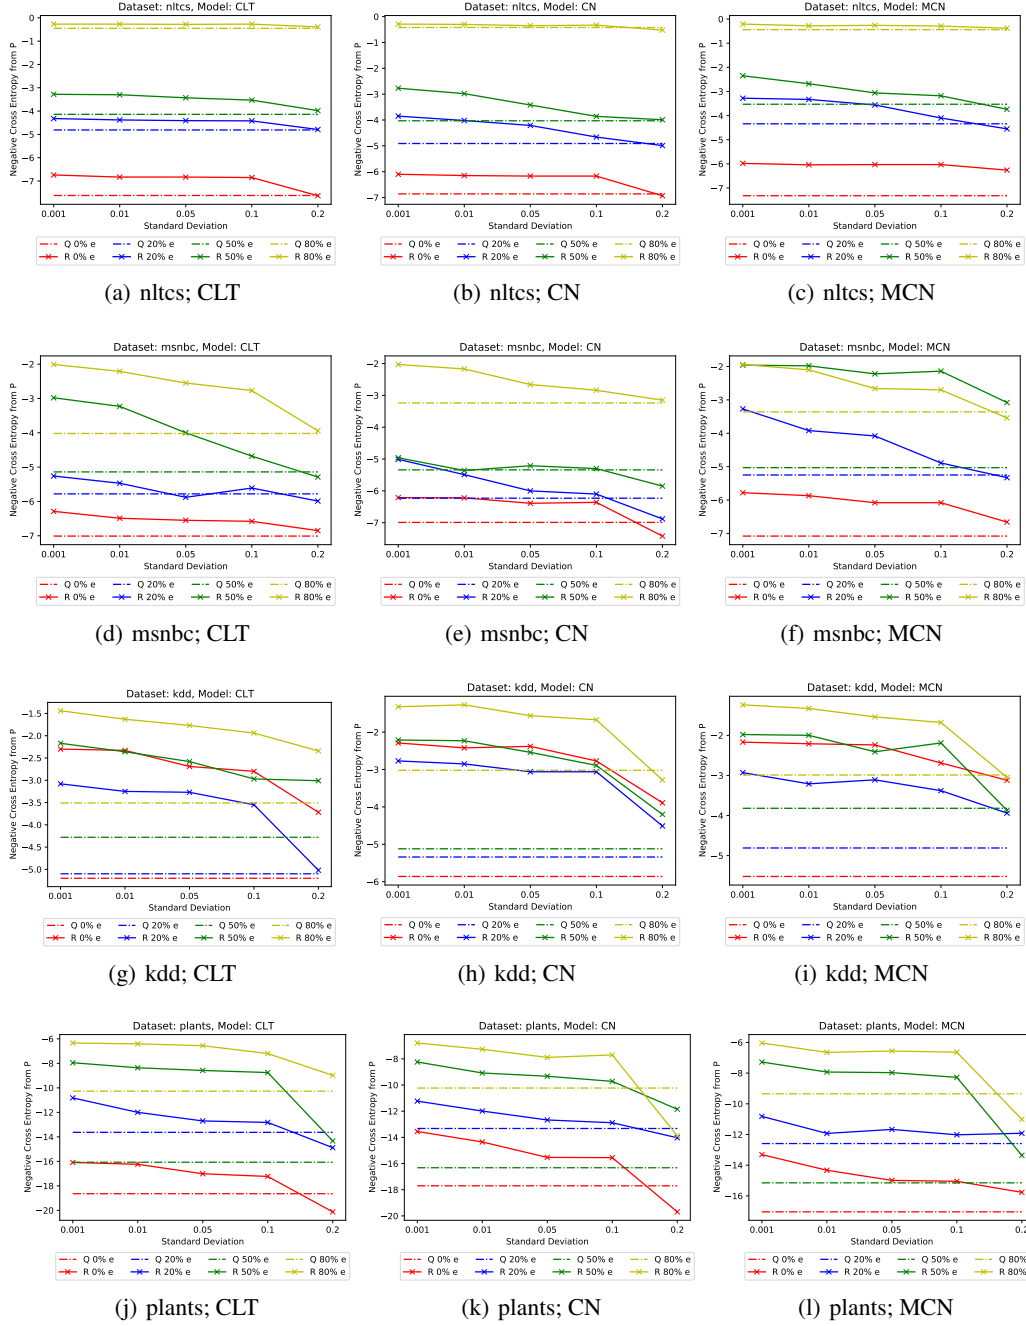

Figure 6: Negative Cross Entropy between  $\mathcal{P}$  and  $\mathcal{Q}$ , and between  $\mathcal{P}$  and  $\mathcal{R}$ , with evidence of 0%, 20%, 50%, and 80% on three different models: CLT, CN, and MCN, as a function of standard deviation  $\sigma$  (of Gaussian noise that is applied to the local statistics  $\mathcal{P}_{jk}(X_j, X_k)$ ) for datasets: nltcs, msnbc, kdd, plants.



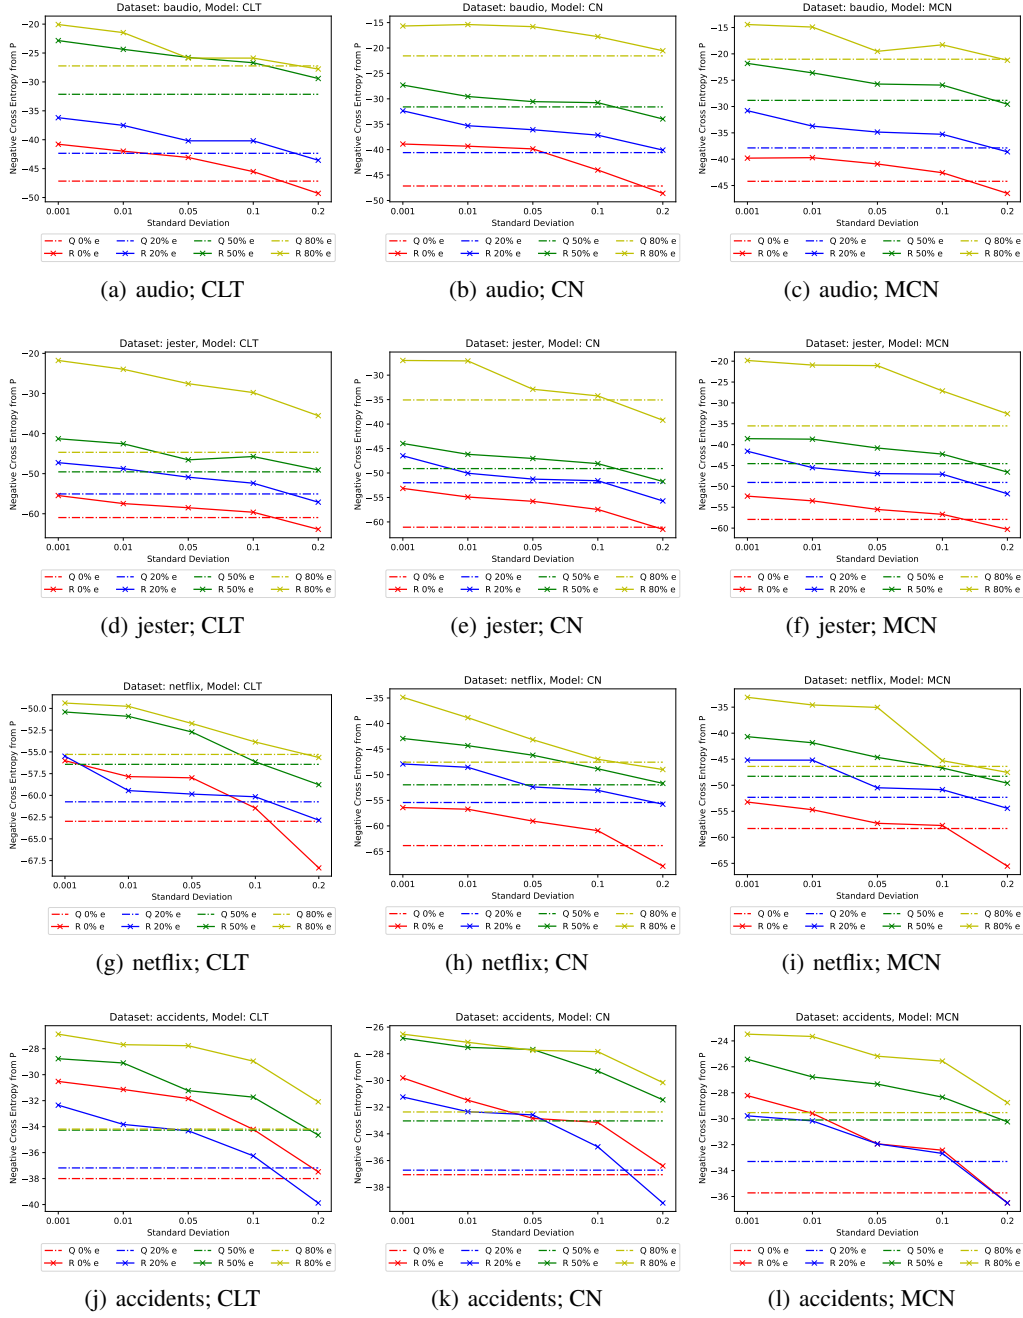

Figure 7: Negative Cross Entropy between  $\mathcal{P}$  and  $\mathcal{Q}$ , and between  $\mathcal{P}$  and  $\mathcal{R}$ , with evidence of 0%, 20%, 50%, and 80% on three different models: CLT, CN, and MCN, as a function of standard deviation  $\sigma$  (of Gaussian noise that is applied to the local statistics  $\mathcal{P}_{jk}(X_j, X_k)$ ) for datasets: audio, jester, netflix, accidents.

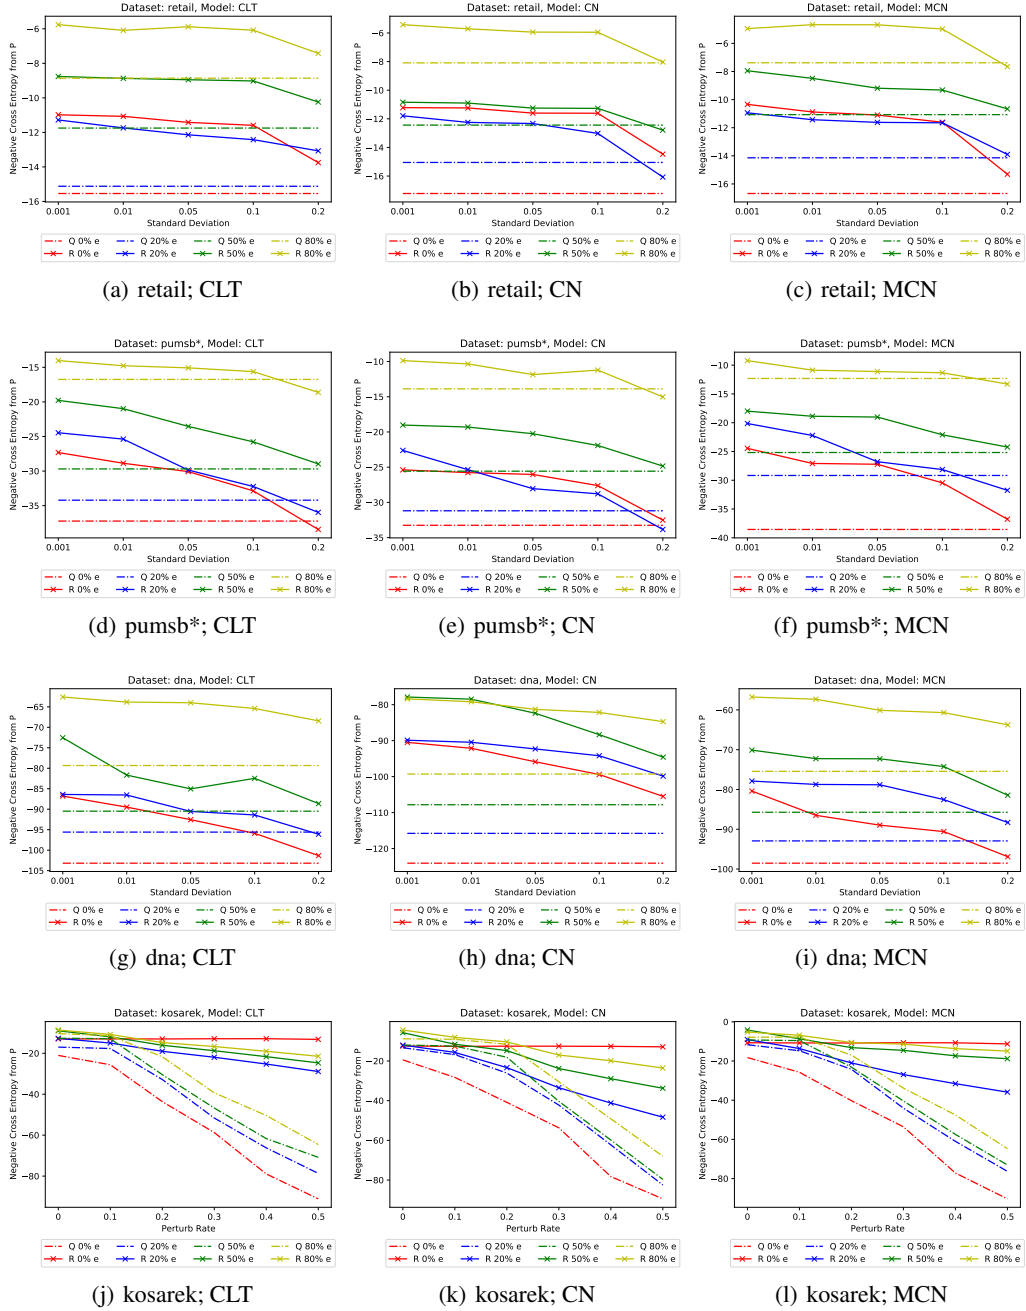

Figure 8: Negative Cross Entropy between  $\mathcal{P}$  and  $\mathcal{Q}$ , and between  $\mathcal{P}$  and  $\mathcal{R}$ , with evidence of 0%, 20%, 50%, and 80% on three different models: CLT, CN, and MCN, as a function of standard deviation  $\sigma$  (of Gaussian noise that is applied to the local statistics  $\mathcal{P}_{jk}(X_j, X_k)$ ) for datasets: retail, pumsb\*, dna, kosarek.

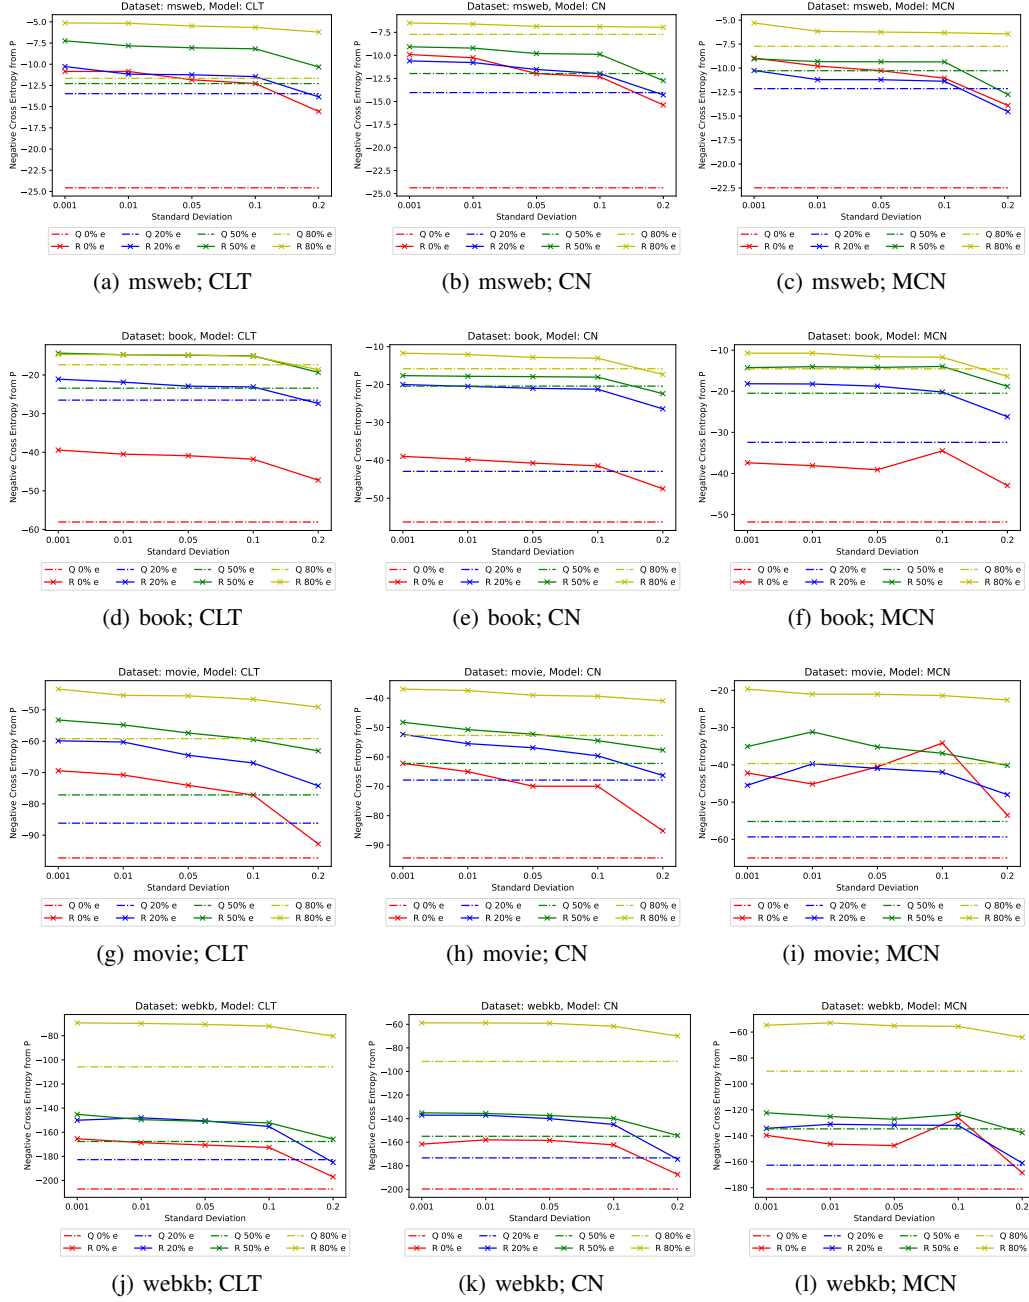

Figure 9: Negative Cross Entropy between  $\mathcal{P}$  and  $\mathcal{Q}$ , and between  $\mathcal{P}$  and  $\mathcal{R}$ , with evidence of 0%, 20%, 50%, and 80% on three different models: CLT, CN, and MCN, as a function of standard deviation  $\sigma$  (of Gaussian noise that is applied to the local statistics  $\mathcal{P}_{jk}(X_j, X_k)$ ) for datasets: msweb, book, movie, webkb.

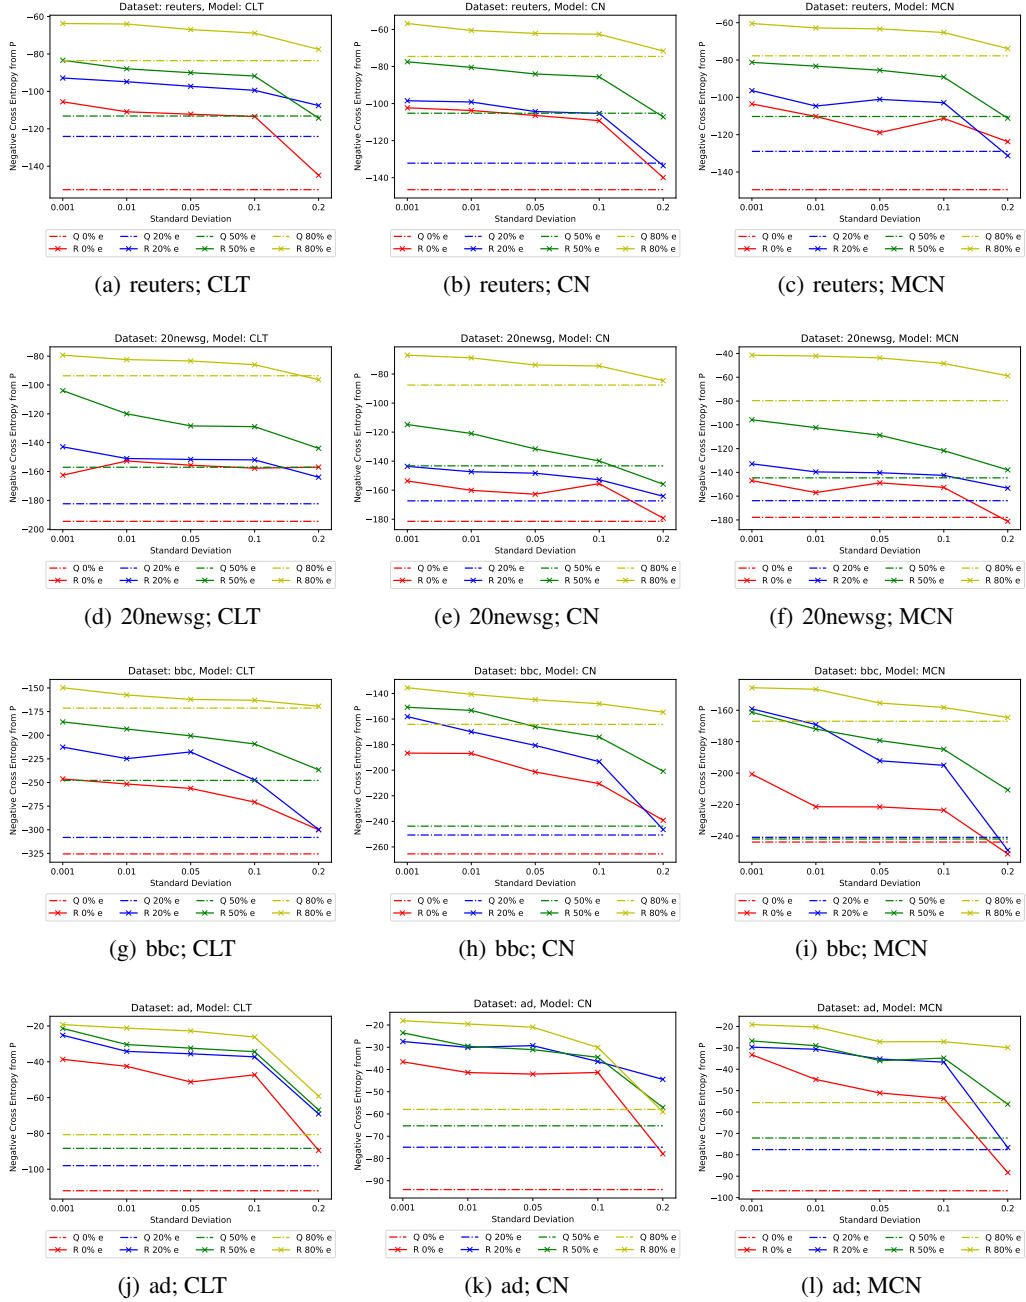

Figure 10: Negative Cross Entropy between  $\mathcal{P}$  and  $\mathcal{Q}$ , and between  $\mathcal{P}$  and  $\mathcal{R}$ , with evidence of 0%, 20%, 50%, and 80% on three different models: CLT, CN, and MCN, as a function of standard deviation  $\sigma$  (of Gaussian noise that is applied to the local statistics  $\mathcal{P}_{jk}(X_j, X_k)$ ) for datasets: reuters, 20newsg, bbc, ad.
